# Supplementary figures and images for: A Comprehensive Analysis of the Peanut SQUAMOSA Promoter Binding Protein-like Gene Family and How AhSPL5 Enhances Salt Tolerance in Transgenic Arabidopsis
Source: MDPI journal article supplement (doi:10.3390/plants13081057), 2024-04-09

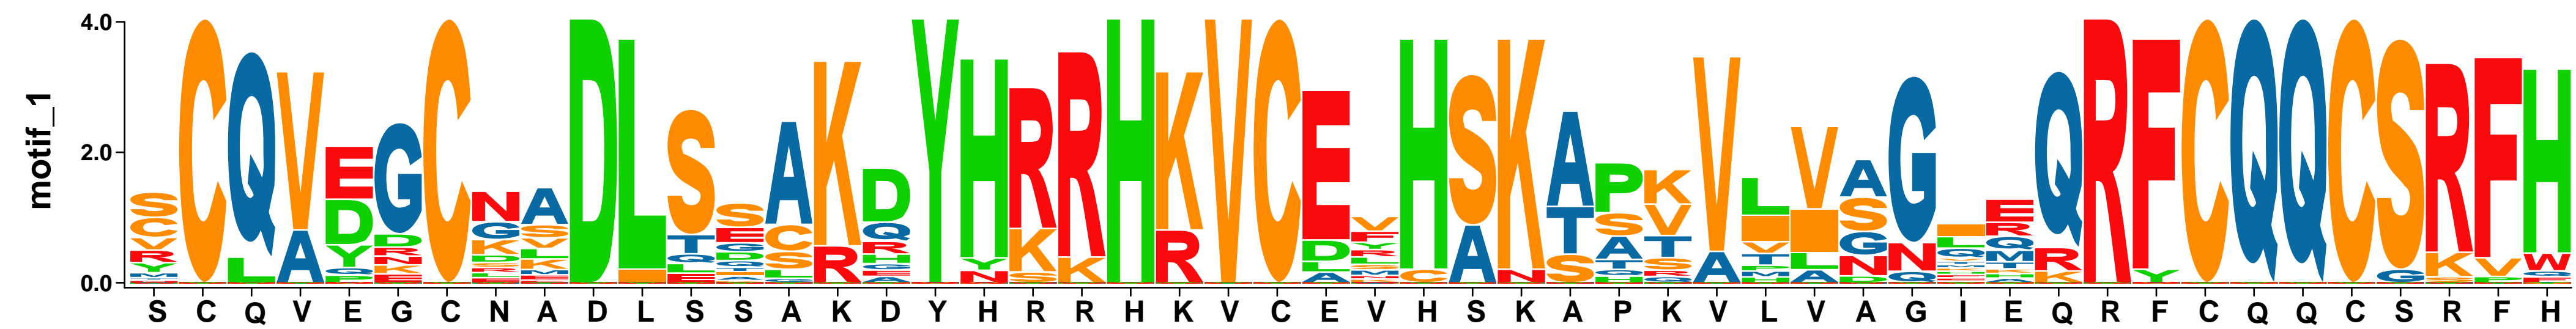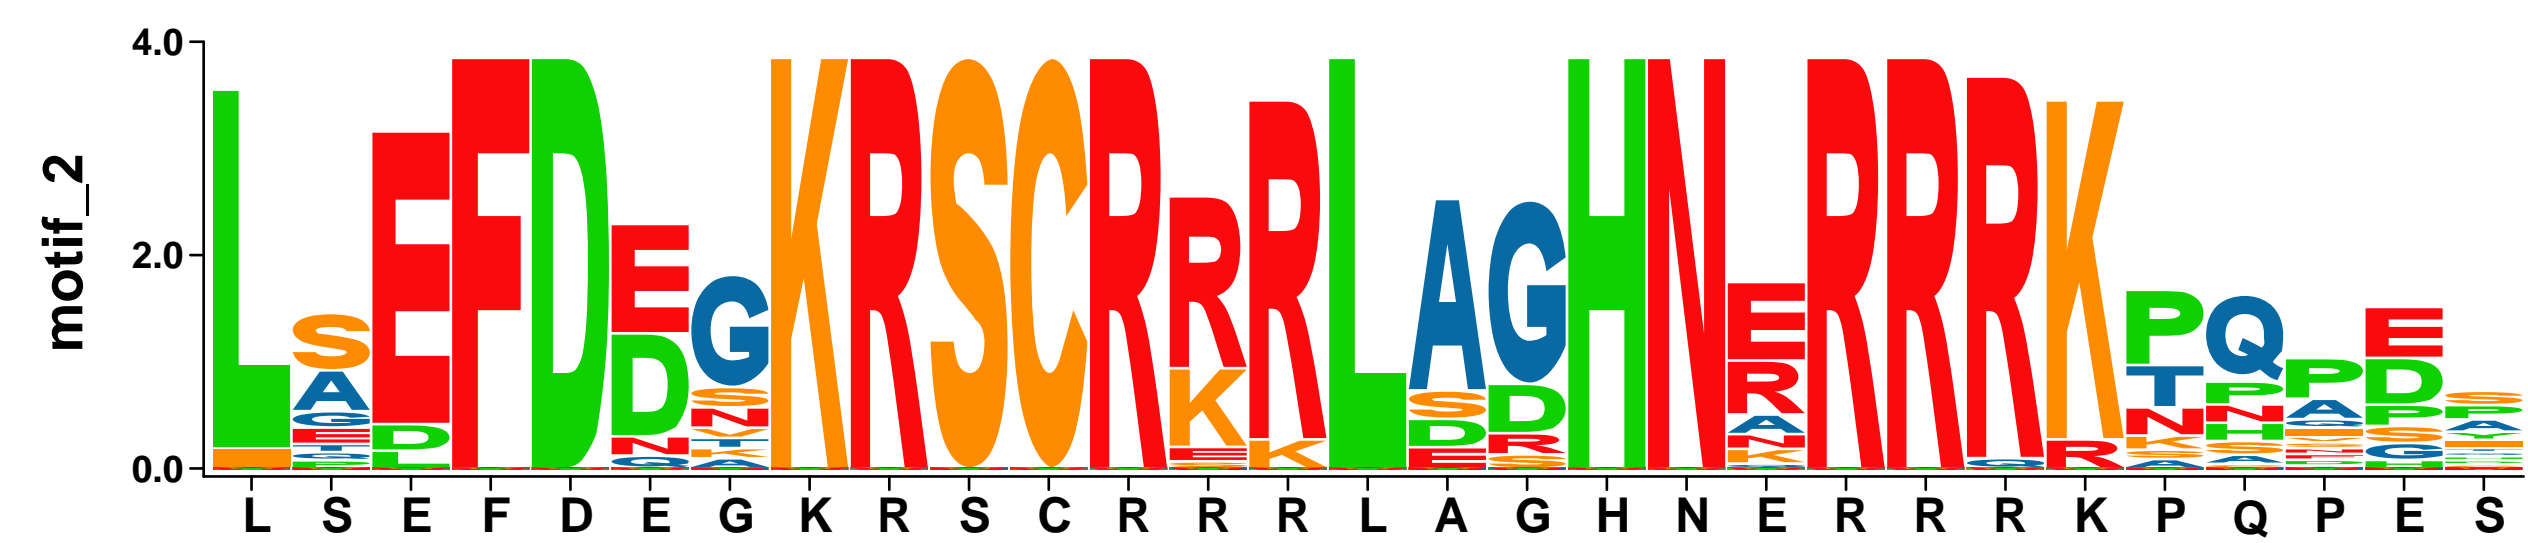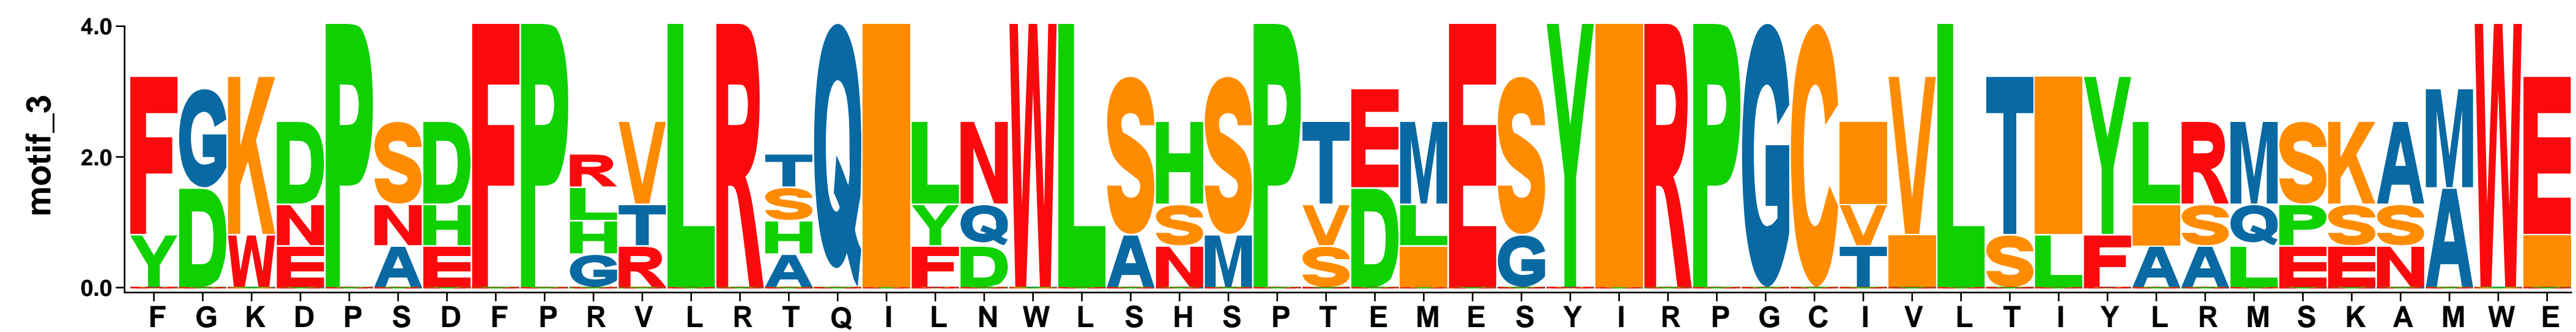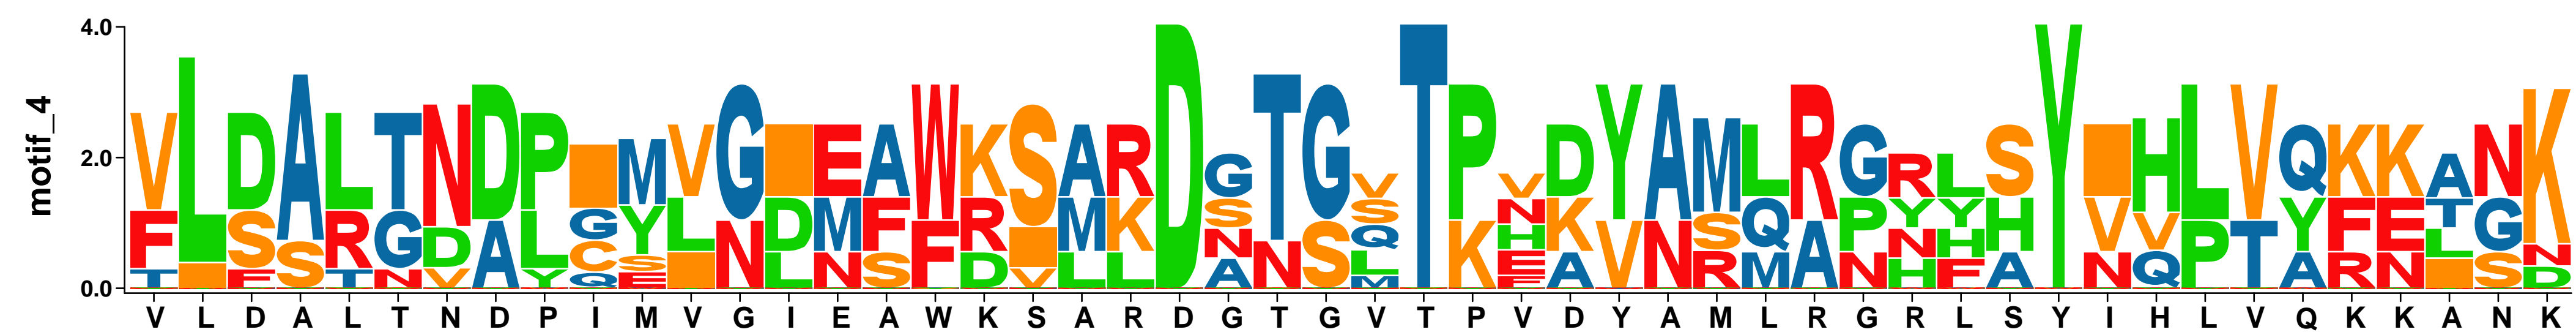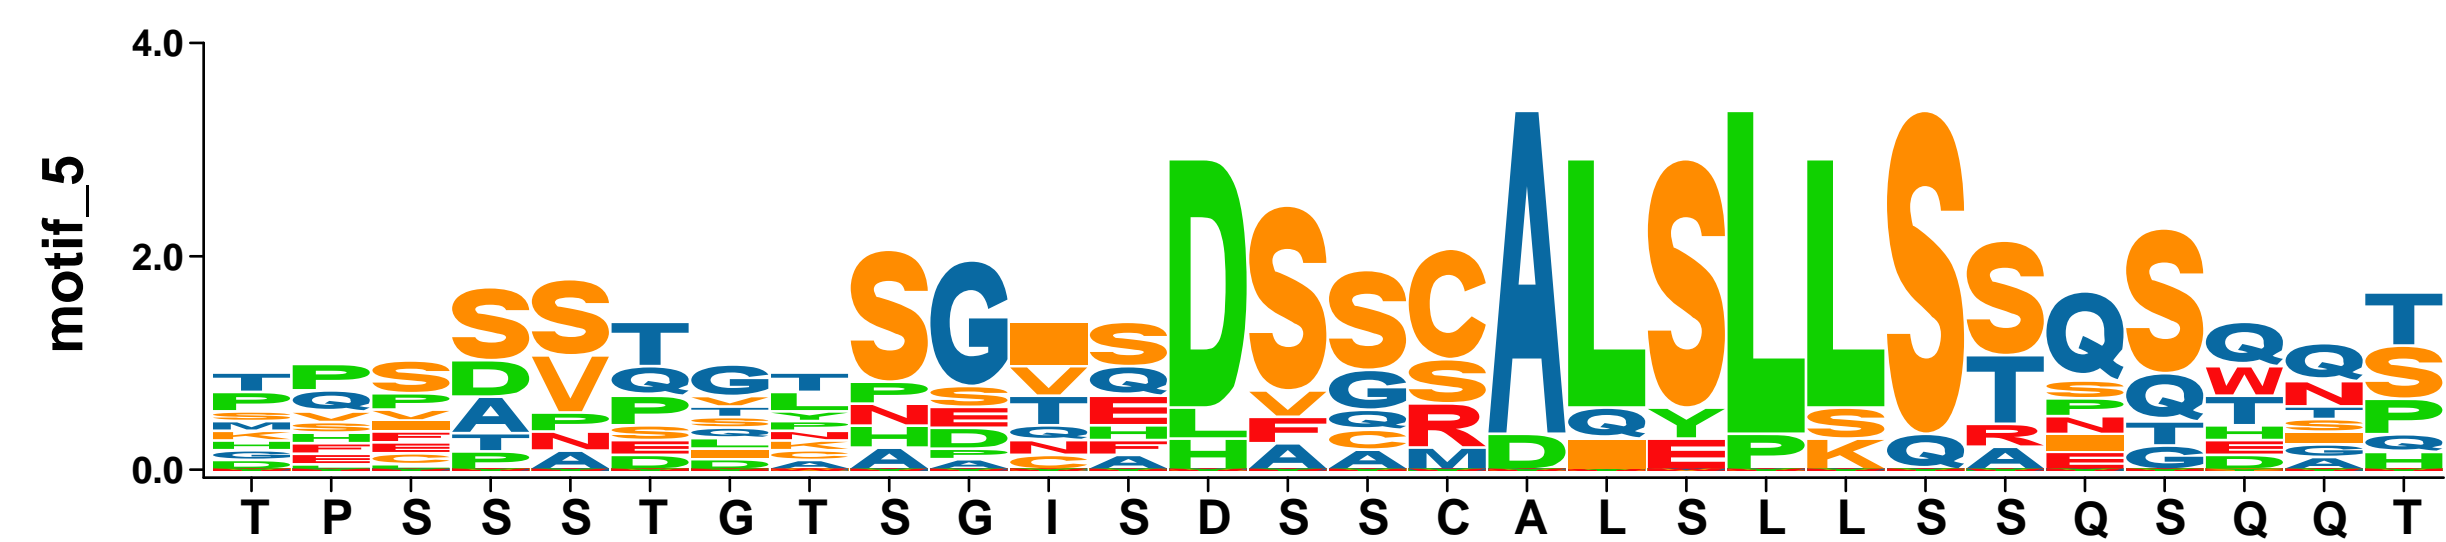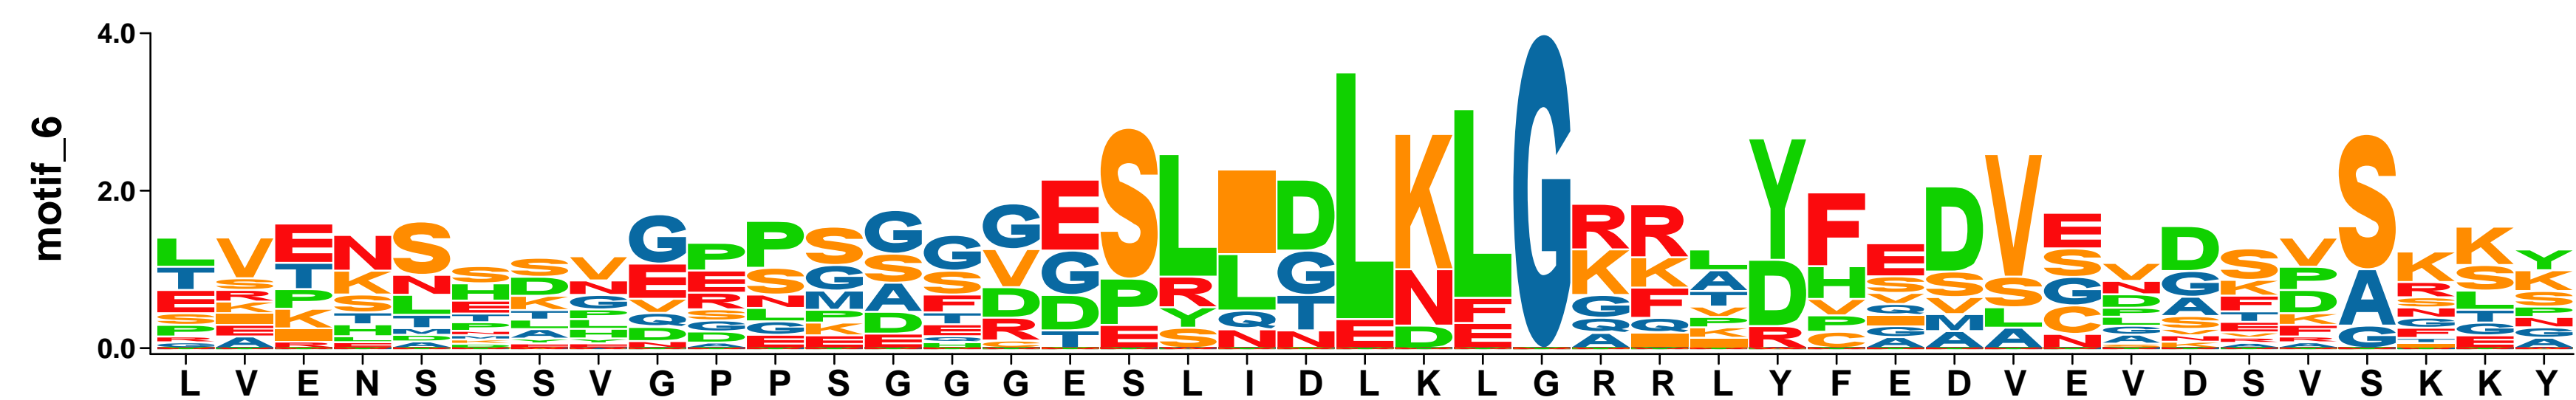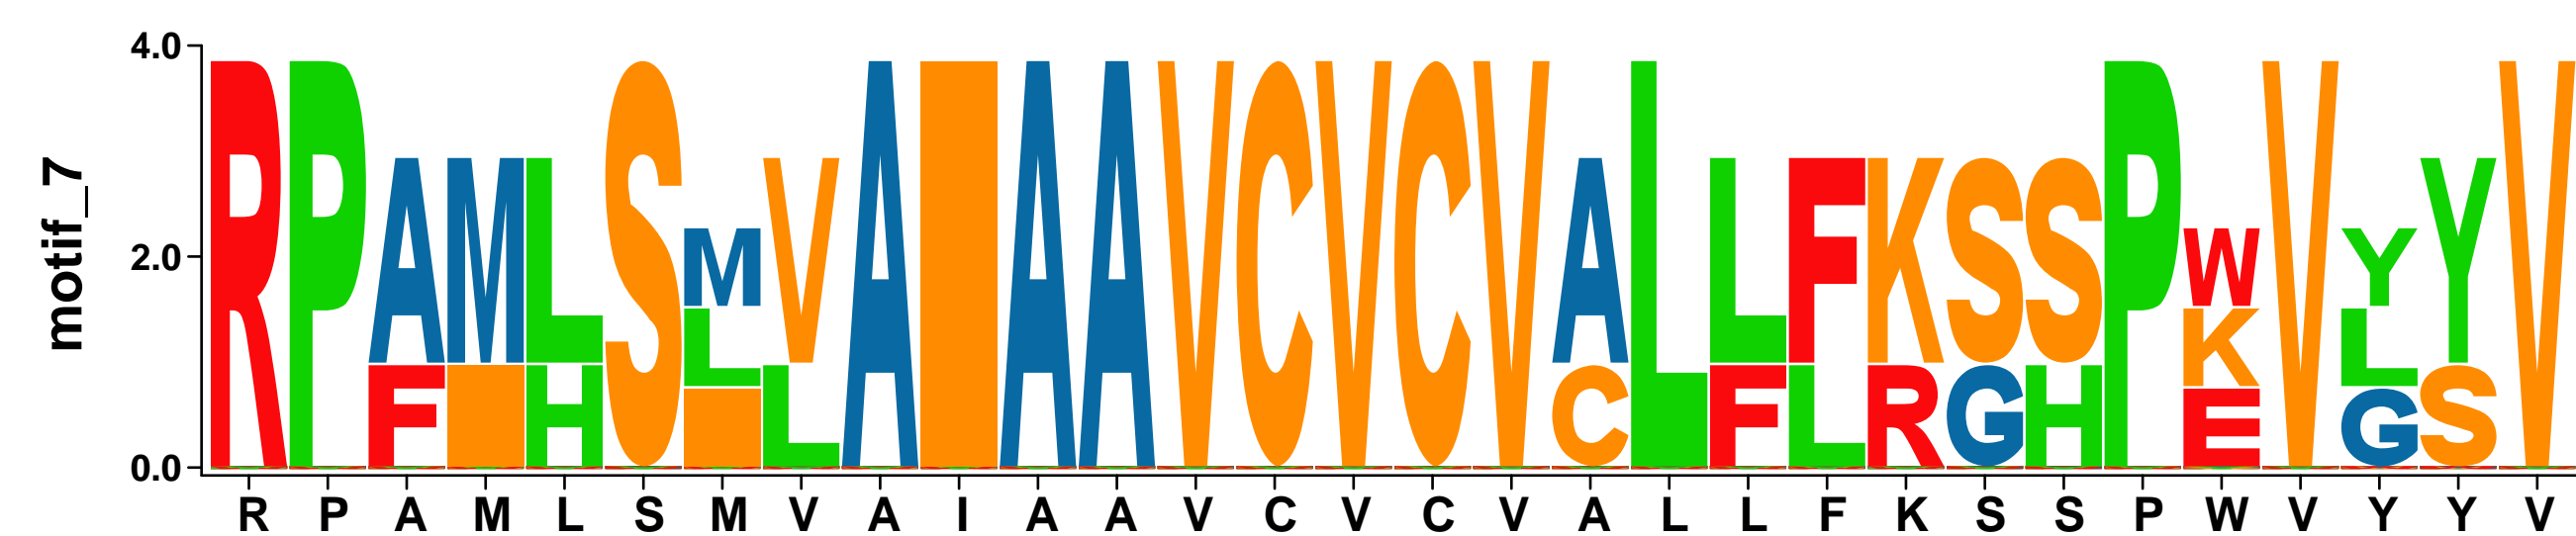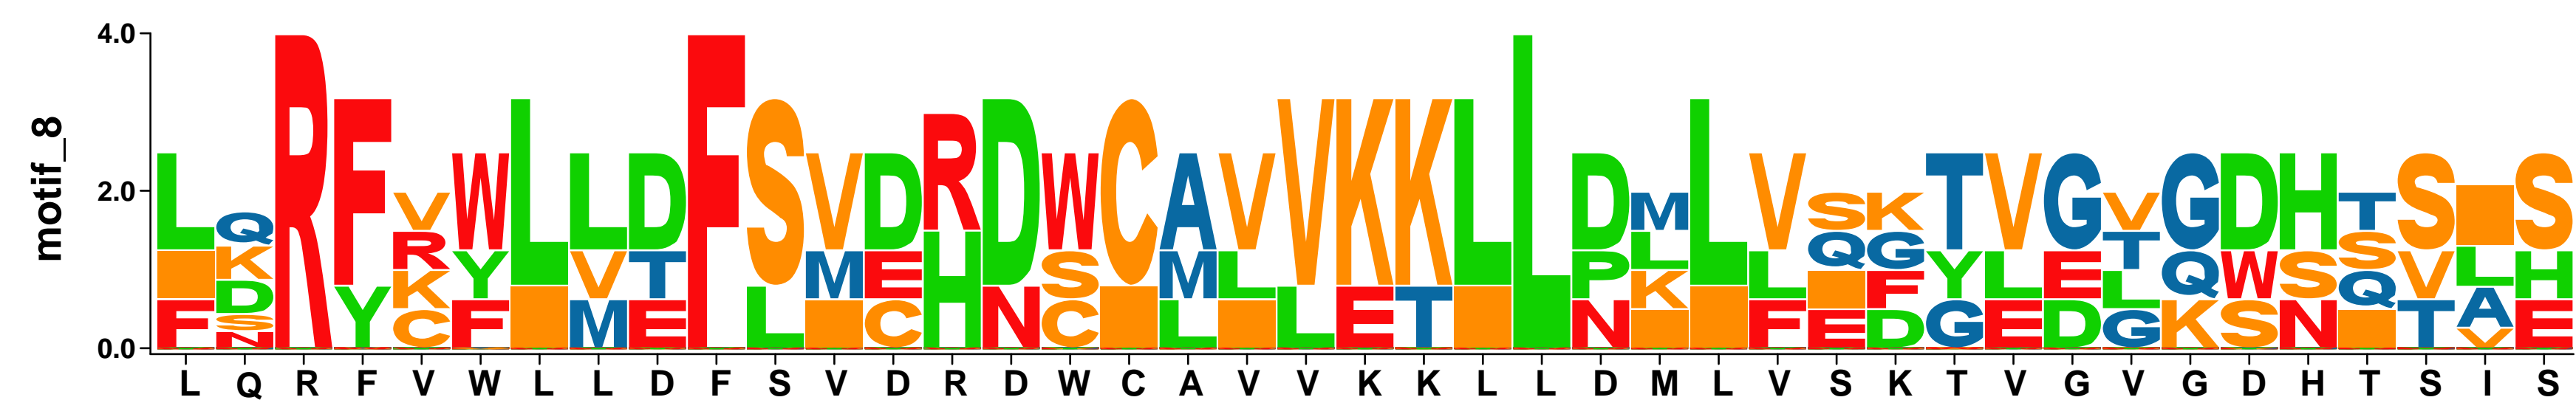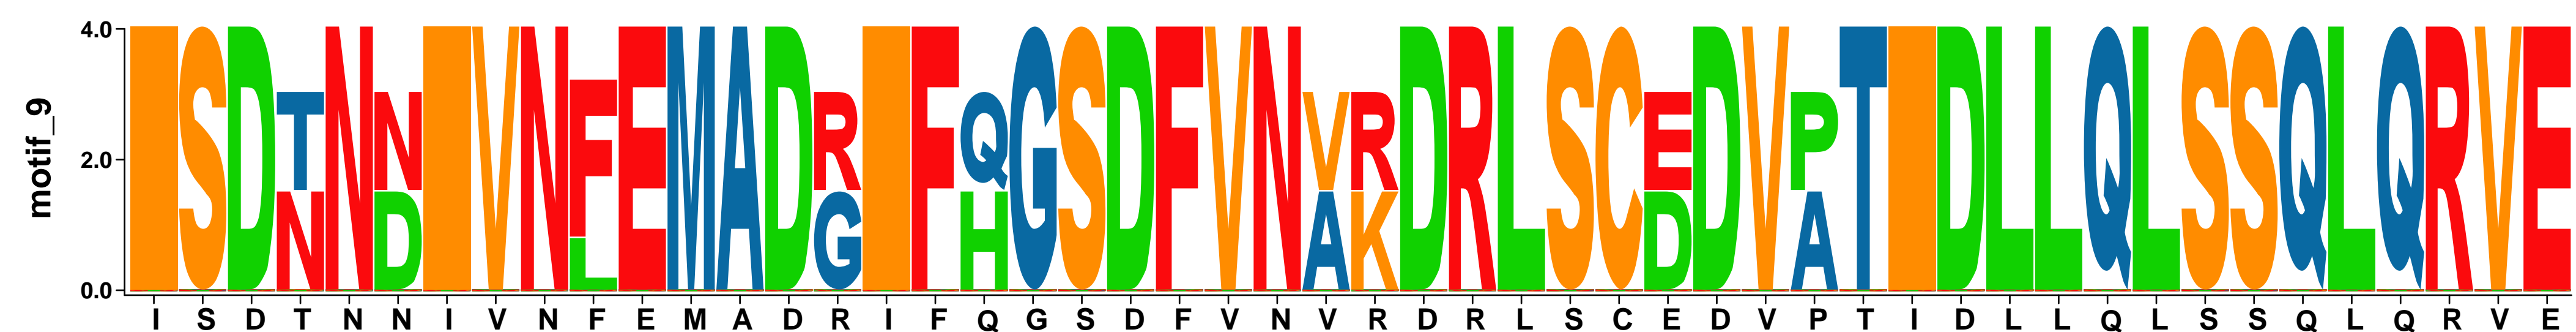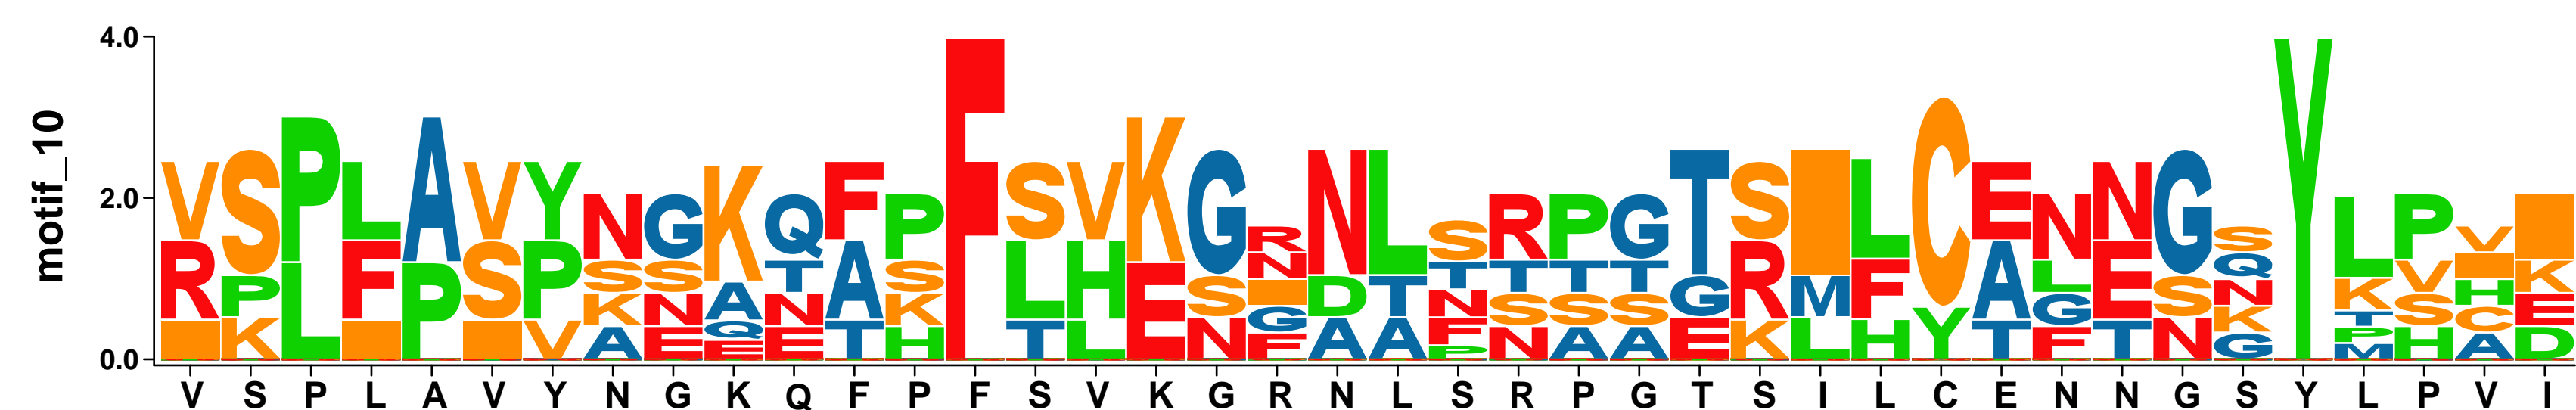

Supplement: s1 [file s1]
